# Supplementary material for: Understanding the effect of sodium polyphosphate on improving the chemical stability of Ti3C2Tz MXene in water
Source: Royal Society of Chemistry journal article supplement (doi:10.1039/d2ta04009c), 2022-01-01
Supplement: d2ta04009c1.pdf [file d2ta04009c1.pdf]

Supplementary Information

**Understanding the Effect of Sodium Polyphosphate on Improving the  
Chemical Stability of  $Ti_3C_2T_z$  MXene in Water**

Shuohan Huang <sup>\*a,b</sup>, Varun Natu<sup>c,d</sup>, Jingyi Tao <sup>a</sup>, Yumin Xia <sup>a</sup>, Vadym N. Mochalin<sup>\*b,e</sup>, Michel  
W. Barsoum<sup>\*c</sup>

<sup>a</sup>State Key Laboratory for Modification of Chemical Fibers and Polymer Materials, College of  
Materials Science and Engineering, Donghua University, Shanghai 201620, China

<sup>b</sup>Department of Chemistry, Missouri University of Science & Technology, Rolla, MO 65409, USA

<sup>c</sup>Department of Materials Science and Engineering, Drexel University, Philadelphia, PA 19104,  
USA

<sup>d</sup>National Chemical Laboratory (CSIR-NCL), Dr. Homi Bhabha Road, Pune 411008, India

<sup>e</sup>Department of Materials Science & Engineering, Missouri University of Science & Technology,  
Rolla, MO 65409, USA

The kinetics of degradation of  $Ti_3C_2T_z$ -Air,  $Ti_3C_2T_z$ -Ar, and  $Ti_3C_2T_z$ -PP samples are shown in Figure 2. The data were fit by the corresponding exponential growth functions:

$$A(t) = 60133.1 - 59536.6 \cdot e^{-\left(\frac{t}{120.6}\right)} \text{ for } Ti_3C_2T_z\text{-Air}$$

$$A(t) = 54881.6 - 53657.1 \cdot e^{-\left(\frac{t}{182.4}\right)} \text{ for } Ti_3C_2T_z\text{-Ar}$$

$$A(t) = 10160.7 - 9653.2 \cdot e^{-\left(\frac{t}{88.4}\right)} \text{ for } Ti_3C_2T_z\text{-PP}$$

The chemical reactions of MXene oxidation and hydrolysis are represented by the equations separately:

hydrolysis of  $Ti_3C_2O_2$  MXene

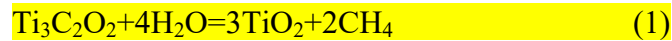

oxidation of  $Ti_3C_2O_2$  MXene

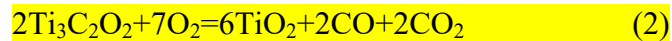

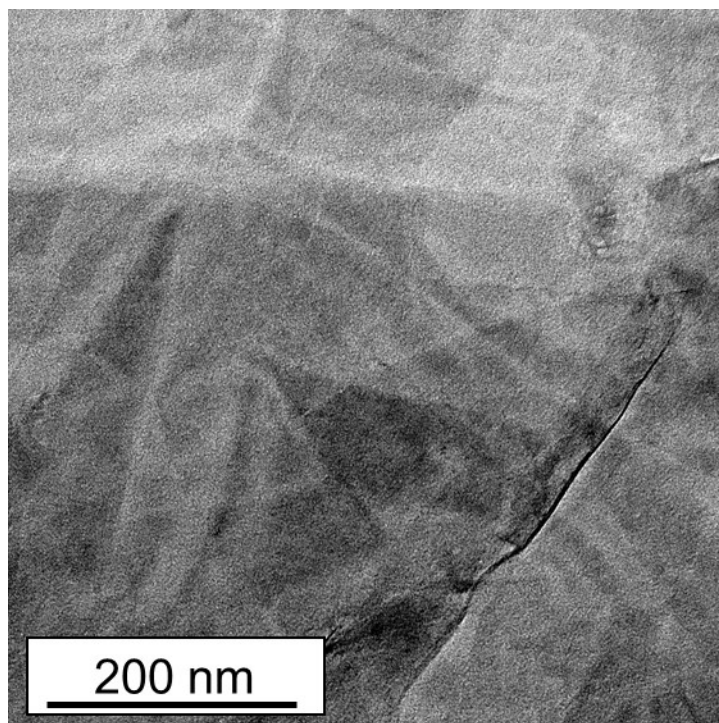

Fig. S1. TEM image of freshly made Ti<sub>3</sub>C<sub>2</sub>T<sub>x</sub> MXene flakes.

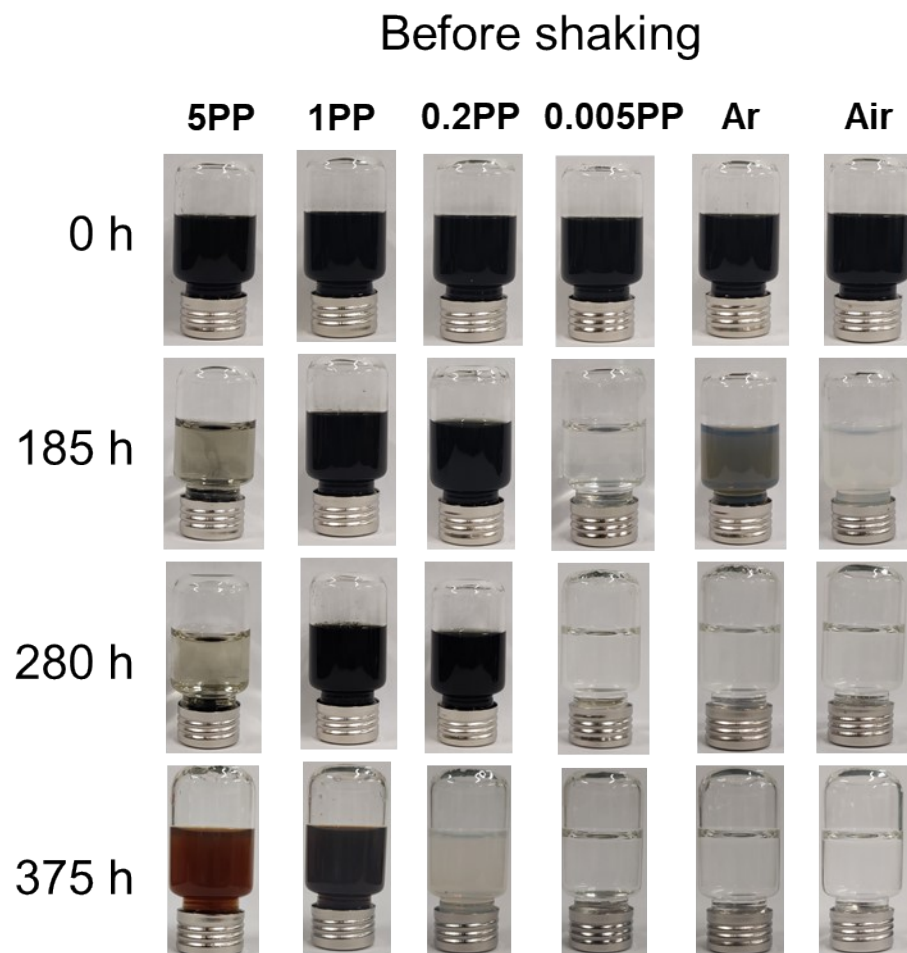

Fig. S2. Visual observations of  $\text{Ti}_3\text{C}_2\text{T}_z$  MXene in different environments over time (before shaking).

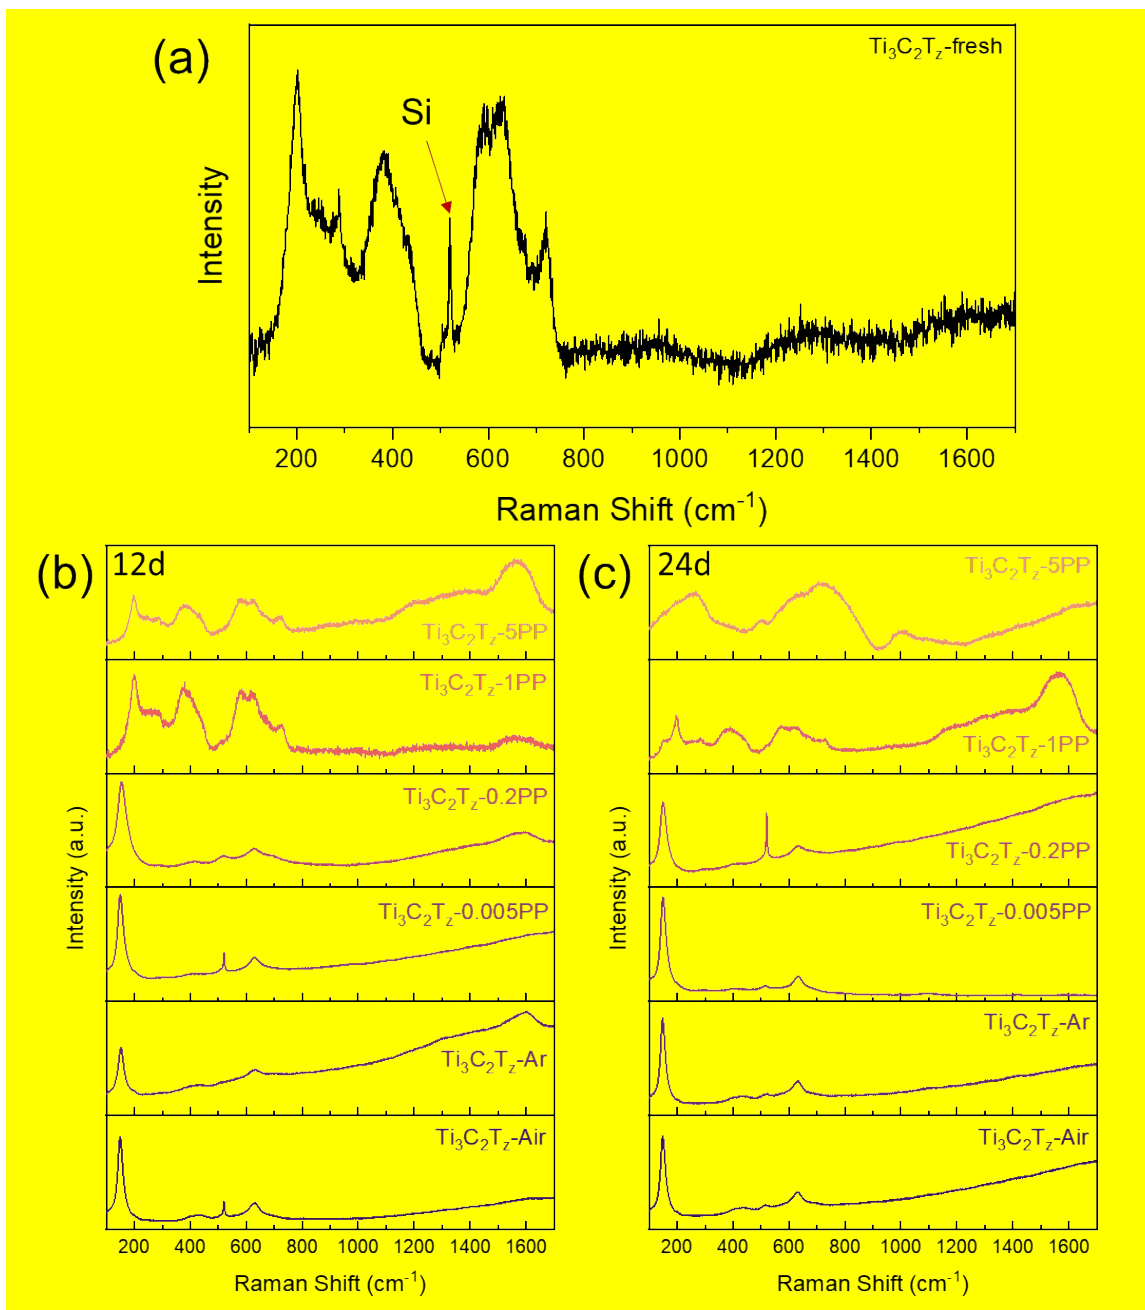

Fig. S3. Raman spectra of (a) fresh  $\text{Ti}_3\text{C}_2\text{T}_z$  MXene, (b)  $\text{Ti}_3\text{C}_2\text{T}_z$  MXene in different environments after 12 days, and (c)  $\text{Ti}_3\text{C}_2\text{T}_z$  MXene in different environments after 24 days. All samples were stored in a 70 °C oven. The peaks at  $\sim 520 \text{ cm}^{-1}$  apparent in some spectra are reflecting the signal from the Si wafer underneath the samples.

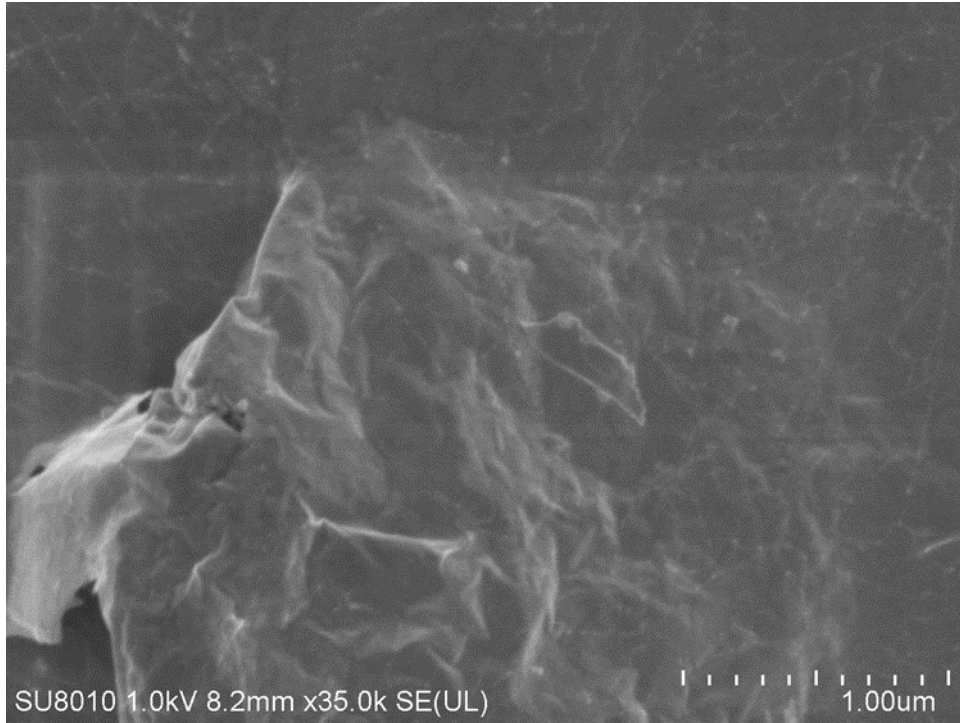

**Fig. S4.** SEM image of freshly made  $\text{Ti}_3\text{C}_2\text{T}_x$  MXene film.

Assuming a MXene sheet with lateral dimensions of 0.8  $\mu\text{m}$  length by 0.5  $\mu\text{m}$  width

Perimeter

$$p = 2 \times 0.8 + 2 \times 0.5 = 2.6 \mu\text{m}$$

Assuming sodium polyphosphate (PP) chain length  $\approx 6 \text{ \AA}$  (this distance was calculated from the distance between the 1<sup>st</sup> and 3<sup>rd</sup> P atom)

Number of PP molecules needed to cap all edges of 1 MXene sheet

$$= 2.6/0.0006 \approx 4333 \text{ molecules or } \approx 7.2 \times 10^{-21} \text{ moles of PP}$$

Volume of 1 MXene sheet assuming 0.001  $\mu\text{m}$  (1 nm) thickness

$$V = 0.8 \times 0.5 \times 0.001 = 4 \times 10^{-4} \mu\text{m}^3$$

Density of MXene

$$\approx 4.93 \frac{\text{g}}{\text{cm}^3} \approx 4.93 \times 10^{-12} \frac{\text{g}}{\mu\text{m}^3} \text{ (density of MXene was assumed to be same as the density of cubic TiC)}$$

Mass of 1 MXene sheet

$$= \frac{4.93 \times 10^{-12} \frac{\text{g}}{\mu\text{m}^3}}{\mu\text{m}^3} \times 4 \times 10^{-4} \mu\text{m}^3 = 1.9 \times 10^{-15} \text{ g} \approx 2 \times 10^{-15} \text{ g}$$

Therefore  $7.2 \times 10^{-21}$  moles of PP are needed per  $2 \times 10^{-15} \text{ g}$  of MXene

$$= 3.6 \times 10^{-6} \text{ moles of PP per g of MXene}$$

$\approx 0.0015 \text{ g of PP/ MXene sheet (Molar mass of PP} = 367.9 \text{ g/mol)}$

As MXene sheet is  $\sim 1 \text{ nm}$  thick and PP molecule thickness  $\approx 0.3 \text{ nm}$  (maximal distance between 2 O atoms connected to the same P atom)  $\approx 3$  PP molecules also need to be stacked vertically along a MXene sheet edge as well for complete coverage.

$$\approx 0.0015 \times 3 \approx 0.005 \text{ g of PP per g of MXene}$$

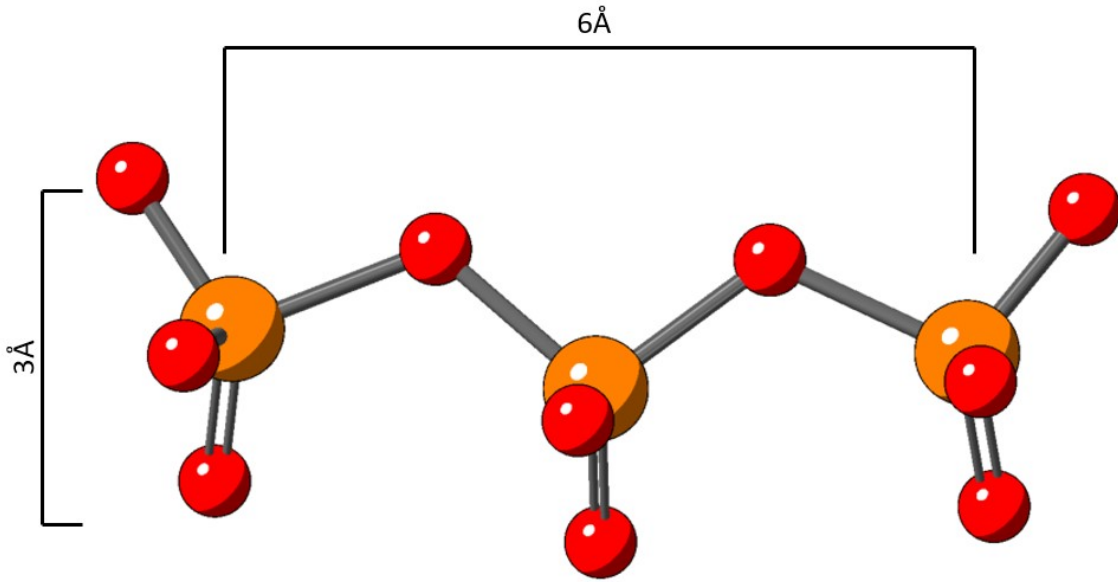

Fig. S5. Repeating unit of polyphosphate.
